# Supplementary material for: N‐Heterocyclic Carbene (NHC) Silver Complexes as Versatile Chemotherapeutic Agents Targeting Human Topoisomerases and Actin
Source: PubMed Central journal article supplement — ChemMedChem. 2022 Aug 17;17(18):e202200345. doi: 10.1002/cmdc.202200345 (PMC9804882; doi:10.1002/cmdc.202200345), 2022-08-17
Supplement: CMDC-17-0-s001.pdf [file CMDC-17-0-s001.pdf]

# ChemMedChem

Supporting Information

## ***N*-Heterocyclic Carbene (NHC) Silver Complexes as Versatile Chemotherapeutic Agents Targeting Human Topoisomerases and Actin**

Annaluisa Mariconda<sup>+</sup>, Domenico Iacopetta<sup>+</sup>, Marco Sirignano, Jessica Ceramella,<sup>\*</sup> Chiara Costabile, Michele Pellegrino, Camillo Rosano, Alessia Catalano, Carmela Saturnino, Hussein El-Kashef, Stefano Aquaro, Maria Stefania Sinicropi<sup>+</sup>, and Pasquale Longo<sup>+</sup>

## Supporting Information

### List of contents

|                                                                                                                           |    |
|---------------------------------------------------------------------------------------------------------------------------|----|
| <b>A: Bis[(N-methyl, N'-[(2-sodium alcoholate-2-phenyl-ethyl)imidazole-2-ylidene]silver(I)] acetate (2)</b> .....         | 1  |
| <sup>1</sup> H-NMR of 2 .....                                                                                             | 1  |
| <sup>13</sup> C-NMR of 2 .....                                                                                            | 1  |
| ESI-MS .....                                                                                                              | 2  |
| <b>B: Bis[(N-methyl, N'-[(2-methoxy-2-phenyl-ethyl)imidazole-2-ylidene]silver(I)] acetate (4)</b> .....                   | 3  |
| <sup>1</sup> H-NMR of 4 .....                                                                                             | 3  |
| <sup>13</sup> C-NMR of 4 .....                                                                                            | 3  |
| ESI-MS of 4 .....                                                                                                         | 4  |
| <b>C: Bis [N-methyl, N'-[(2-hydroxy-2-phenyl-ethyl)imidazole-2-ylidene]silver(I)] acetate (5)</b> .....                   | 5  |
| <sup>1</sup> H-NMR of 5 .....                                                                                             | 5  |
| <sup>13</sup> C-NMR of 5 .....                                                                                            | 5  |
| MALDI-MS of 5 .....                                                                                                       | 7  |
| <b>D: Bis[4,5-dichloro-[(N-methyl-N'(2-hydroxy-2-phenyl-ethyl)imidazole-2-ylidene]silver(I)] acetate (6)</b> .....        | 8  |
| <sup>1</sup> H-NMR of 6 .....                                                                                             | 8  |
| <sup>13</sup> C-NMR of 6 .....                                                                                            | 8  |
| MALDI of 6.....                                                                                                           | 10 |
| <b>E: Computational details relative to calculations on Ag and Au complexes and BDE of NHC and halogen ligands.</b> ..... | 11 |

**A: Bis[(N-methyl, N'-[(2-sodium alcoholate-2-phenyl-ethyl)imidazole-2-ylidene]silver(I)] acetate (2)**

**<sup>1</sup>H-NMR of 2**

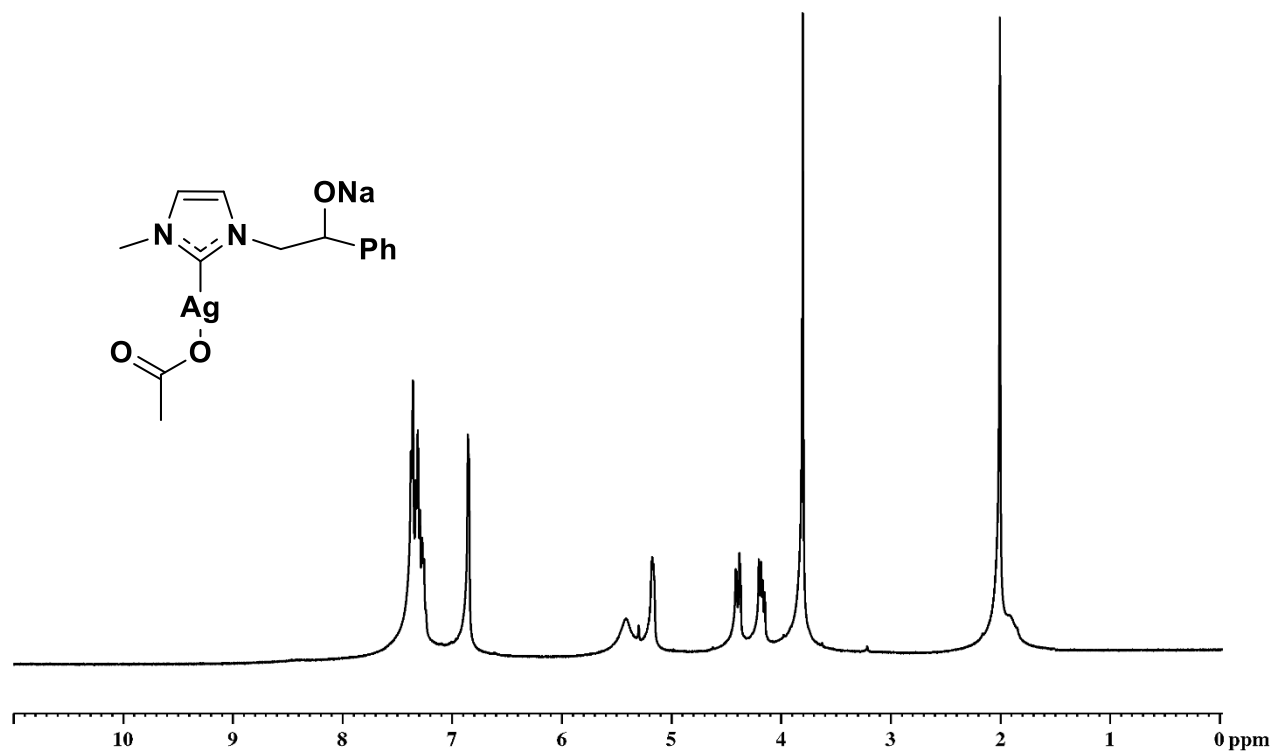

<sup>1</sup>H-NMR (400 MHz, CDCl<sub>3</sub>): δ 7.32 (m, 5H, aromatic protons); 6.86 (d, 2H, NCHCHN); 5.19 (s, 1H, CHO<sup>-</sup>); 4.40 (dd, 1H, NCH<sub>2</sub>); 4.18 (dd, 1H, NCH<sub>2</sub>); 3.80 (s, 3H, NCH<sub>3</sub>); 2.01 (s, 3H, OCOCH<sub>3</sub>).

**<sup>13</sup>C-NMR of 2**

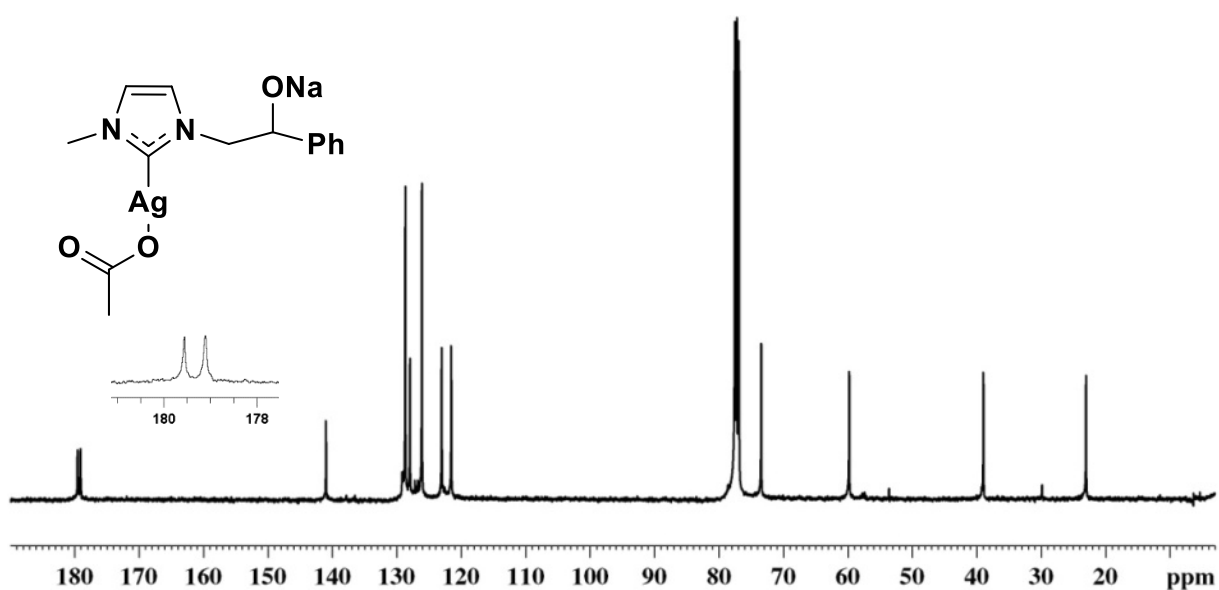

$^{13}\text{C}\{^1\text{H}\}$  NMR (100 MHz,  $\text{CDCl}_3$ ):  $\delta$  179.5 (NCN), 179.0 (C=O), 140.9 (*ipso* carbon aromatic ring), 128.6, 127.9, 126.1, (aromatic carbons), 123.0 (NCHCHN), 121.5 (NCHCHN), 73.4 ( $\text{CHO}^-$ ), 59.7 (NCH<sub>2</sub>), 38.9 (NCH<sub>3</sub>), 23.0 (COCH<sub>3</sub>).

### ESI-MS

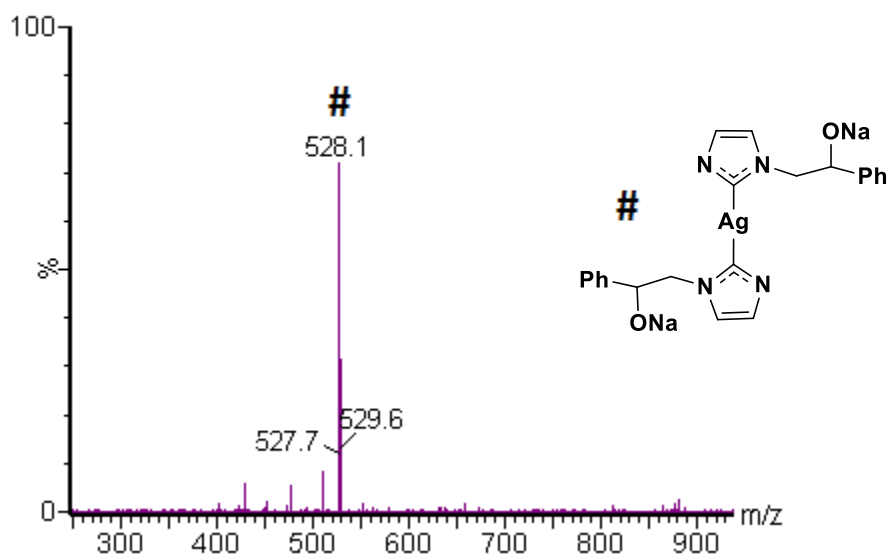

ESI-MS = 528.1 attributable to  $[\text{C}_{22}\text{H}_{20}\text{AgN}_4\text{Na}_2\text{O}_2]^+$

**B: Bis[(N-methyl, N'-[(2-methoxy-2-phenyl-ethyl)imidazole-2-ylidene]silver(I)] acetate (4)**

**<sup>1</sup>H-NMR of 4**

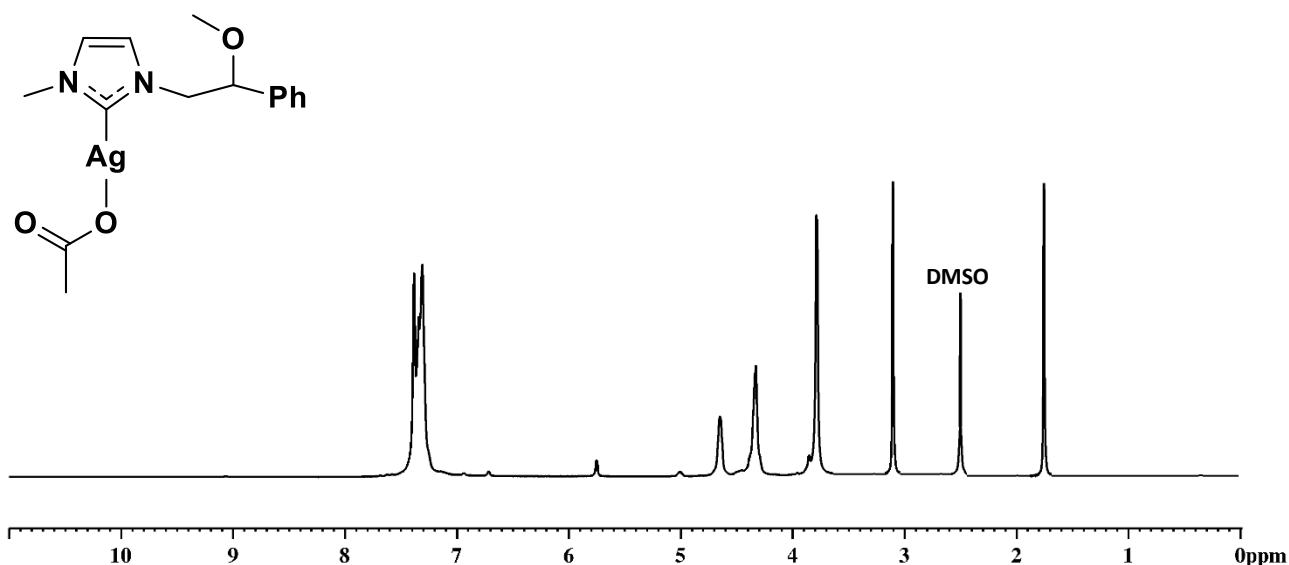

<sup>1</sup>H-NMR (400 MHz, DMSO-d<sub>6</sub>):  $\delta$  7.34-7.26 (m, 7H, aromatic protons), 4.60 (m, 1H, OCH), 4.30-4.27 (m, 2H, NCH<sub>2</sub>), 3.74 (s, 3H, NCH<sub>3</sub>), 3.07 (s, 3H, OCH<sub>3</sub>), 1.98 (s, 3H, CH<sub>3</sub>COO).

**<sup>13</sup>C-NMR of 4**

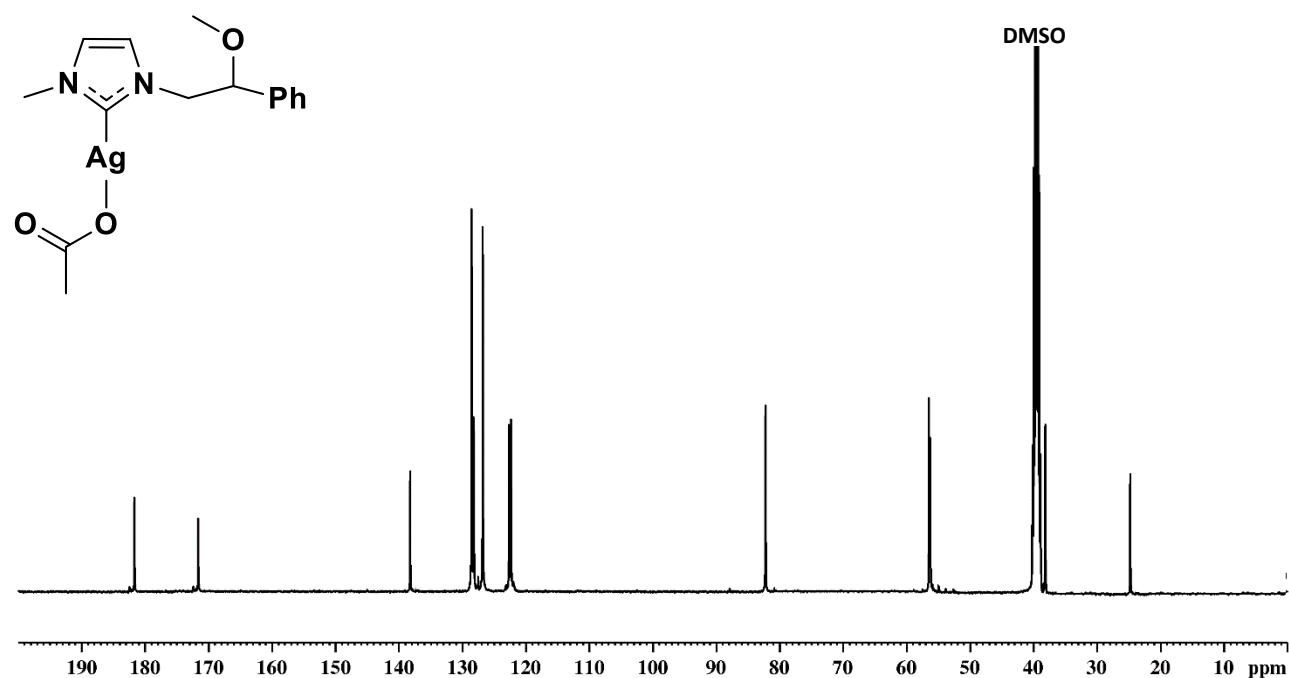

<sup>13</sup>C{<sup>1</sup>H} NMR (100 MHz, DMSO-d<sub>6</sub>):  $\delta$  182.7 (NCN), 173.4 (CH<sub>3</sub>COO) 137.2 (*ipso* carbon of *Ph* ring), 128.7, 128.3, 126.6 (aromatic carbons, *Ph* ring), 122.6, 122.3 (*backbone* carbons C=C), 83.3 (CHO), 56.7 (NCH<sub>2</sub>), 54.2 (OCH<sub>3</sub>), 38.2 (NCH<sub>3</sub>), 24.1 (CH<sub>3</sub>COO).

**ESI-MS of 4**

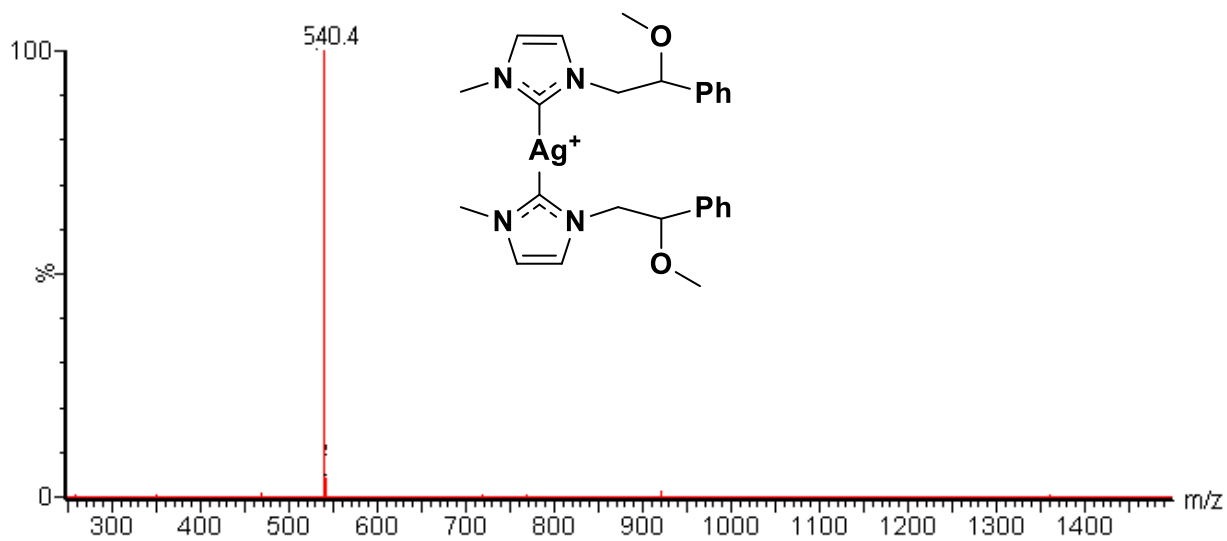

**ESI-MS = 540.4** attributable to  $[\text{C}_{26}\text{H}_{32}\text{AgN}_4\text{O}_2]^+$

**C: Bis [N-methyl, N'-[(2-hydroxy-2-phenyl-ethyl)imidazole-2-ylidene]silver(I)] acetate (5)**

**<sup>1</sup>H-NMR of 5**

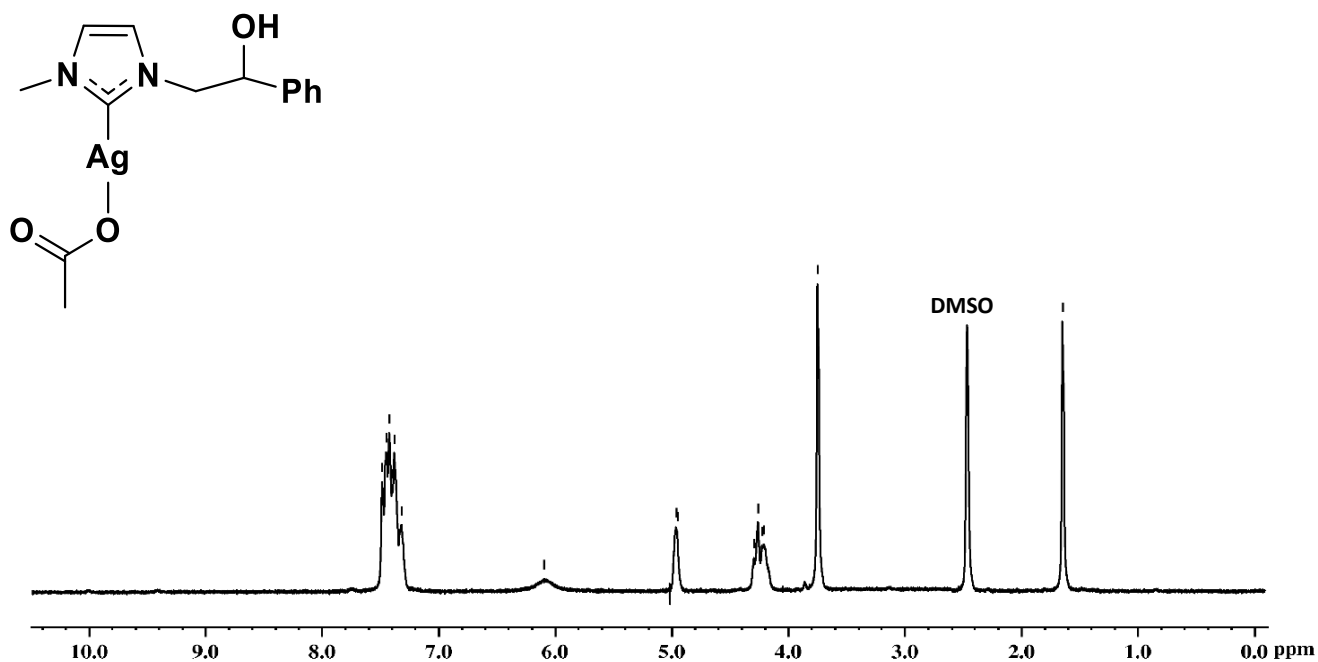

<sup>1</sup>H-NMR (400 MHz, DMSO-d<sub>6</sub>): δ 7.41-7.24 (m, 7H, aromatic protons), 6.05 (b, 1H, OH) 4.94 (m, 1H, OCH), 4.29-4.21 (m, 2H, NCH<sub>2</sub>), 3.75 (s, 3H, NCH<sub>3</sub>), 1.73 (s, 3H, CH<sub>3</sub>COO).

**<sup>13</sup>C-NMR of 5**

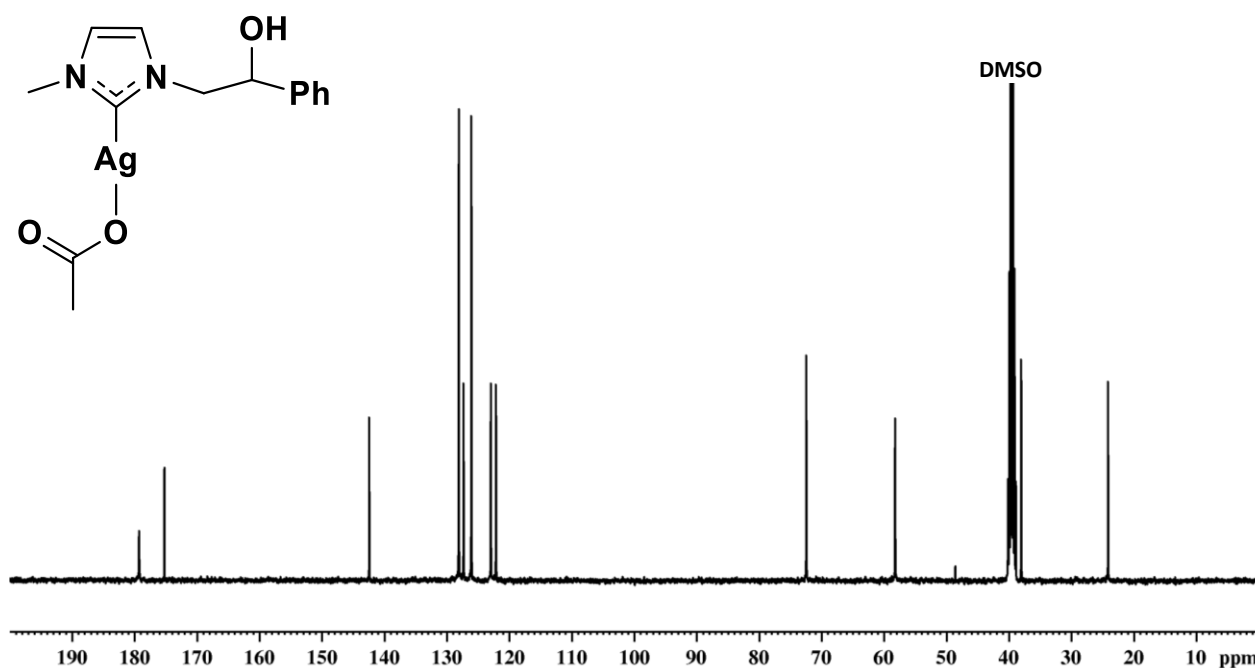

$^{13}\text{C}\{^1\text{H}\}$  NMR (100 MHz, DMSO- $\text{d}_6$ ):  $\delta$  179.3 (NCN), 175.2 ( $\text{CH}_3\text{COO}$ ) 142.4 (*ipso carbon of Ph ring*), 128.1, 127.3, 126.0 (*aromatic carbons, Ph ring*), 122.9, 122.1 (*backbone carbon C=C*), 72.4 (OCH), 58.2 (NCH<sub>2</sub>), 38.0 (NCH<sub>3</sub>), 24.1 ( $\text{CH}_3\text{COO}$ ).



## MALDI-MS of 5

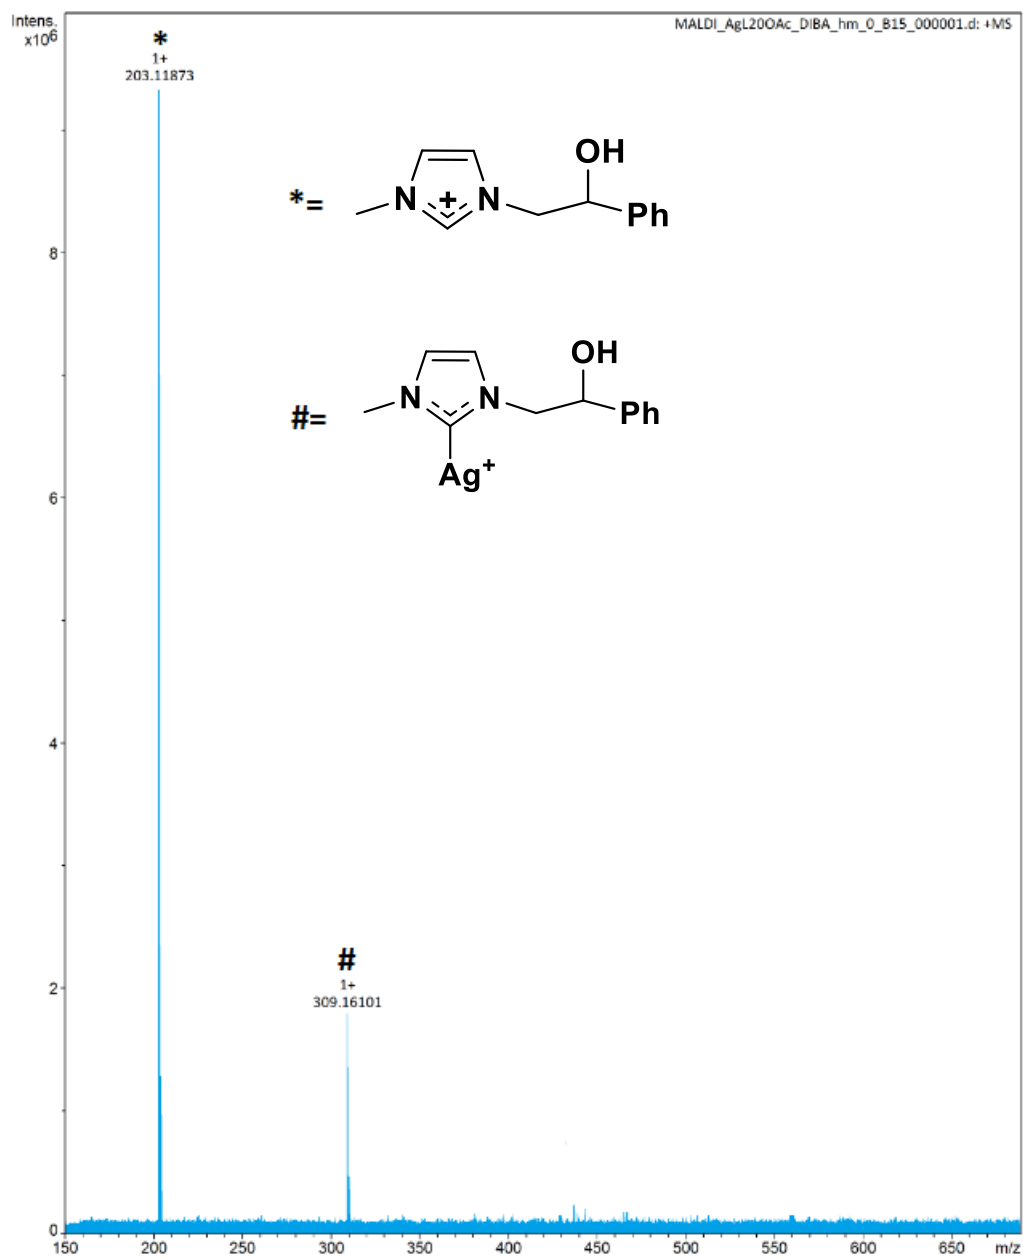

**MALDI-MS** = 309.16101 Dalton attributable to  $[C_{12}H_{14}AgN_2O]^+$ , 203.11873 Dalton attributable to  $[C_{12}H_{15}N_2O]^+$ .

**D: Bis[4,5-dichloro-[(N-methyl-N'(2-hydroxy-2-phenyl-ethyl)imidazole-2-ylidene)silver(I)] acetate (6)**

**<sup>1</sup>H-NMR of 6**

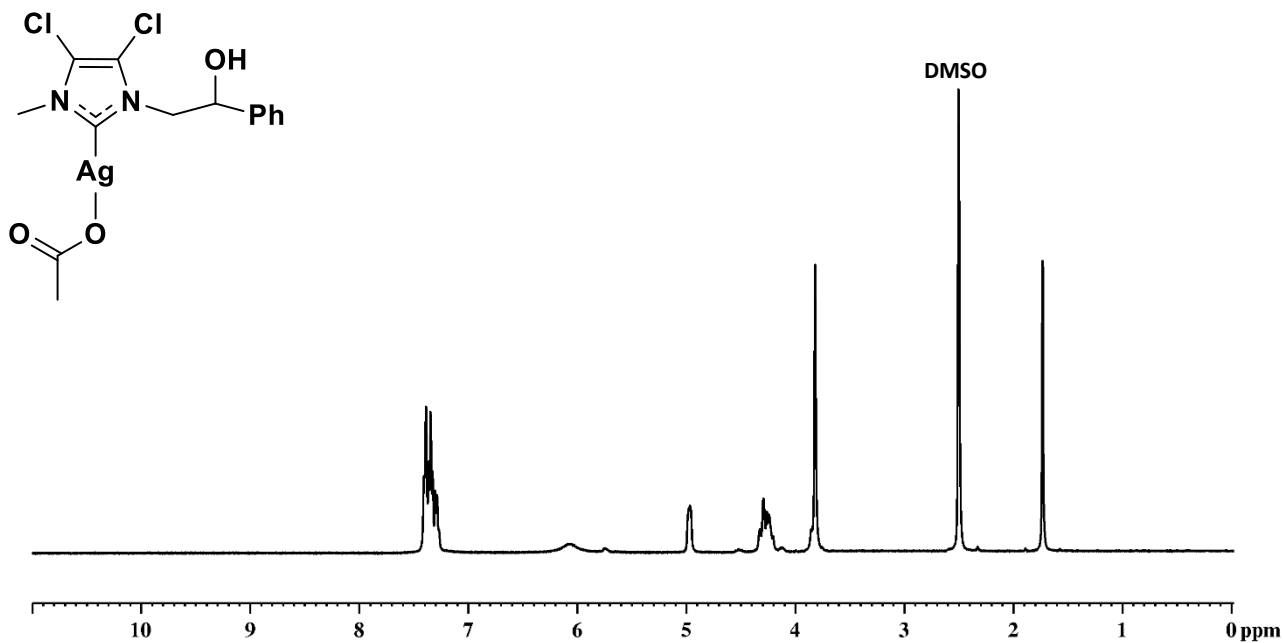

**<sup>13</sup>C-NMR of 6**

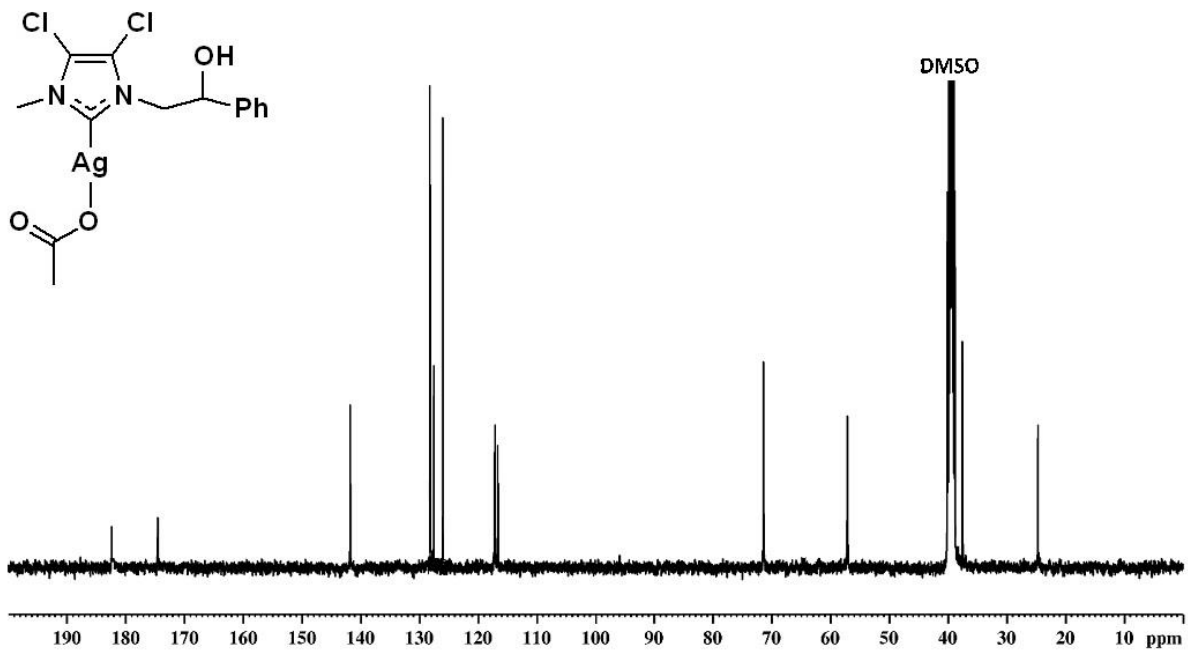

$^{13}\text{C}\{^1\text{H}\}$  NMR (100 MHz, DMSO- $d_6$ ):  $\delta$  182.2 (NCN), 174.5 ( $\text{CH}_3\text{COO}$ ), 141.7 (*ipso carbon* of Ph ring), 128.2, 127.5, 126.0, (*aromatic carbons, Ph ring*), 117.1, 116.6 (*backbone carbon C=C*), 71.4 (OCH), 57.1 ( $\text{NCH}_2$ ), 37.5 ( $\text{NCH}_3$ ), 24.7 ( $\text{CH}_3\text{COO}$ ).

## MALDI of 6

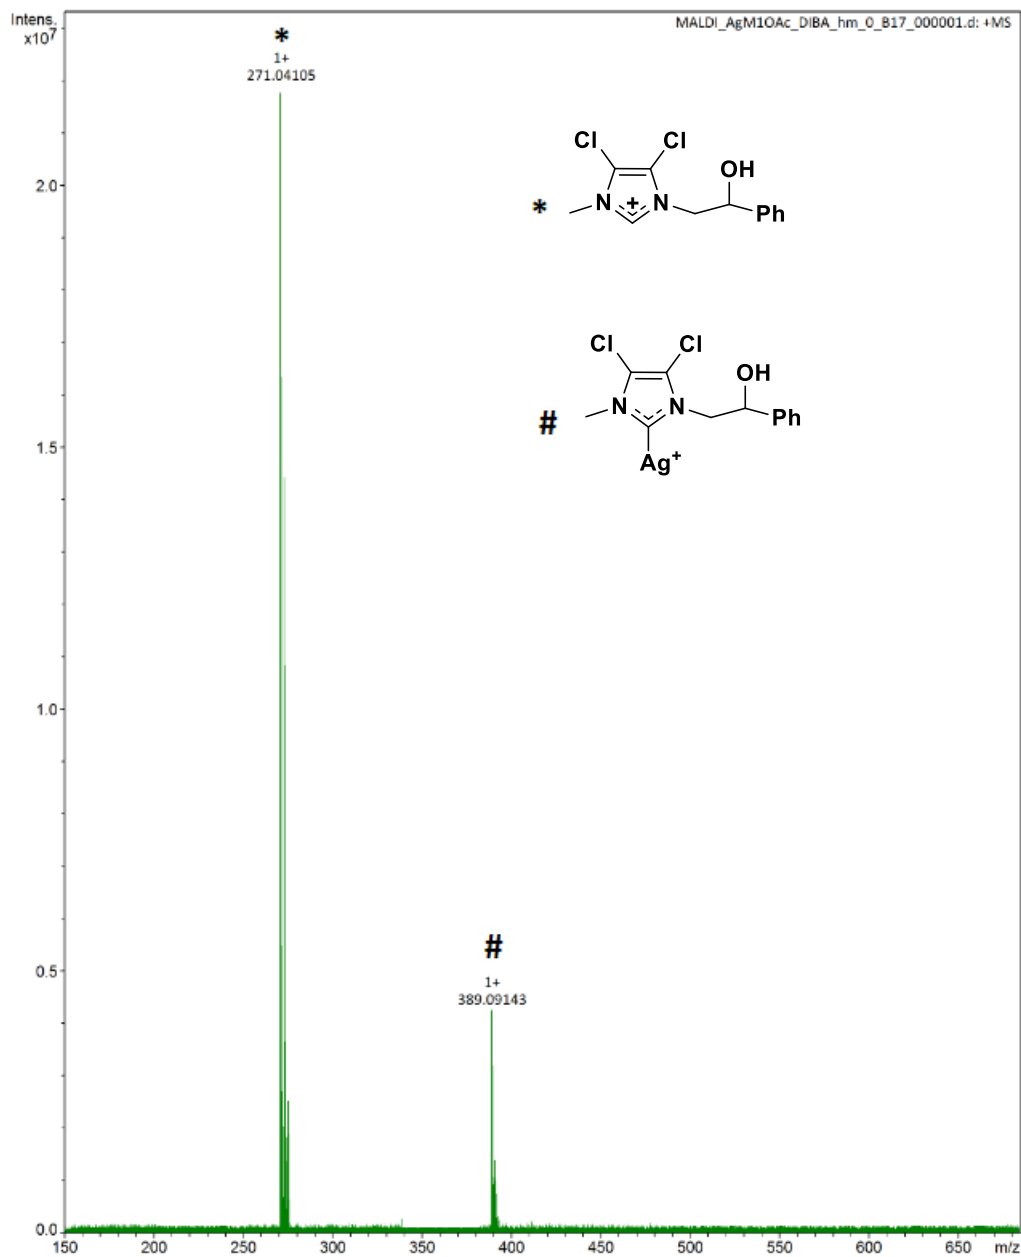

**MALDI-MS** = 389.09143 Dalton attributable to  $[C_{12}H_{12}AgCl_2N_2O]^+$ , 271.04105 Dalton attributable to  $[C_{12}H_{13}Cl_2N_2O]^+$ .

### ***E: Computational details relative to calculations on Ag and Au complexes and BDE of NHC and halogen ligands.***

The DFT calculations were performed with the Gaussian09 set of programs,<sup>1</sup> using the PBE0 model.<sup>2</sup> The electronic configuration of the molecular systems was described with 6-311G(d,p) basis set for H, C, N, O, and Cl.<sup>3</sup> For Ag and I we used the small-core, quasi-relativistic Stuttgart/Dresden effective core potential, with an associated (8s7p6d)/[6s5p3d] valence basis set contracted according to a (311111/22111/411) scheme (standard SDD keywords in gaussian09).<sup>4</sup> The geometry optimizations were performed without symmetry constraints and the characterization of the located stationary points was performed by analytical frequency calculations.

---

<sup>1</sup> Gaussian 09, Revision A.02, Frisch, M. J.; Trucks, G. W.; Schlegel, H. B.; Scuseria, G. E.; Robb, M. A.; Cheeseman, J. R.; Scalmani, G.; Barone, V.; Mennucci, B.; Petersson, G. A.; Nakatsuji, H.; Caricato, M.; Li, X.; Hratchian, H. P.; Izmaylov, A. F.; Bloino, J.; Zheng, G.; Sonnenberg, J. L.; Hada, M.; Ehara, M.; Toyota, K.; Fukuda, R.; Hasegawa, J.; Ishida, M.; Nakajima, T.; Honda, Y.; Kitao, O.; Nakai, H.; Vreven, T.; Montgomery, J. A., Jr.; Peralta, J. E.; Ogliaro, F.; Bearpark, M.; Heyd, J. J.; Brothers, E.; N. Kudin, K.; Staroverov, V. N.; Kobayashi, R.; Normand, J.; Raghavachari, K.; Rendell, A.; Burant, J. C.; Iyengar, S. S.; Tomasi, J.; Cossi, M.; Rega, N.; Millam, J. M.; Klene, M.; Knox, J. E.; Cross, J. B.; Bakken, V.; Adamo, C.; Jaramillo, J.; Gomperts, R.; Stratmann, R. E.; Yazyev, O.; Austin, A. J.; Cammi, R.; Pomelli, C.; Ochterski, J. W.; Martin, R. L.; Morokuma, K.; Zakrzewski, V. G.; Voth, G. A.; Salvador, P.; Dannenberg, J. J.; Dapprich, S.; Daniels, A. D.; Farkas, O.; Foresman, J. B.; Ortiz, J. V.; Cioslowski, J.; Fox, D. J. Gaussian, Inc., Wallingford CT, **2009**.

<sup>2</sup> C. Adamo and V. Barone, "Toward reliable density functional methods without adjustable parameters: The PBE0 model," *J. Chem. Phys.*, **110** (1999) 6158-69.

<sup>3</sup> (a) A. D. McLean and G. S. Chandler, "Contracted Gaussian-basis sets for molecular calculations. 1. 2nd row atoms, Z=11-18," *J. Chem. Phys.*, **72** (1980) 5639-48. (b) K. Raghavachari, J. S. Binkley, R. Seeger, and J. A. Pople, "Self-Consistent Molecular Orbital Methods. 20. Basis set for correlated wave-functions," *J. Chem. Phys.*, **72** (1980) 650-54.

<sup>4</sup> a) Haeusermann, U., Dolg, M., Stoll, H. and Preuss, H. *Mol. Phys.* **1993**, *78*, 1211– 1224. b) Kuechle, W., Dolg, M., Stoll, H. and Preuss, H. *J. Chem. Phys.* **1994**, *100*, 7535– 7542. c) Leininger, T., Nicklass, A., Stoll, H., Dolg, M. and Schwerdtfeger, P. *J. Chem. Phys.* **1996**, *105*, 1052– 1059.

### Cartesian coordinates and energies of calculated structures.

30

**1** E(gas) = -807.708689321 A.U.  
Ag 0.993000 -0.093009 -0.064269  
C 0.292688 1.946592 -0.396035  
N -1.031383 2.229288 -0.406326  
N 0.871514 3.115822 -0.017794  
C -1.273786 3.533162 -0.034763  
C -0.067516 4.100723 0.207457  
C 2.299371 3.275672 0.133400  
H 2.680044 4.033198 -0.558589  
H 2.547517 3.564077 1.158504  
H 2.762447 2.312632 -0.085365  
C -2.057790 1.229535 -0.651926  
C -2.199309 0.219798 0.533875  
H -2.990288 1.764485 -0.856769  
H -1.772020 0.657833 -1.538882  
C -3.501938 -0.554904 0.271684  
O -1.138737 -0.573191 0.690580  
H -2.421092 0.869188 1.424853  
H 0.192151 5.103552 0.506558  
H -2.268845 3.944316 0.022104  
C -3.417346 -1.914062 -0.015036  
C -4.564443 -2.659418 -0.264338  
C -5.818048 -2.057797 -0.219595  
C -5.914750 -0.702331 0.081805  
C -4.763788 0.038317 0.325822  
H -2.419906 -2.343472 -0.012767  
H -4.482058 -3.719987 -0.487697  
H -6.715046 -2.641113 -0.408000  
H -6.890051 -0.224910 0.132992  
H -4.848230 1.094210 0.578983  
I 3.322703 -1.539709 0.014242

36

**2** E(gas) = -1024.53871319 A.U.  
Ag 1.245297 -0.526561 -0.175076  
C 0.803307 1.543631 -0.410774  
N -0.460983 2.029393 -0.399733  
N 1.564347 2.591649 -0.004592  
C -0.490536 3.344546 0.008789  
C 0.793177 3.704781 0.252965  
C 3.005730 2.523004 0.130706  
H 3.492789 3.092472 -0.667704  
H 3.304853 2.935345 1.098173  
H 3.317107 1.473873 0.081567  
C -1.631703 1.204546 -0.646114  
C -1.898397 0.185250 0.513449  
H -2.476518 1.880913 -0.810394  
H -1.456368 0.624156 -1.556005  
C -3.321309 -0.355312 0.281368  
O -0.979464 -0.773247 0.604621  
H -1.985122 0.832376 1.430823  
H 1.211449 4.644085 0.577586  
H -1.407630 3.905415 0.091363  
C -3.472819 -1.706764 -0.014461  
C -4.734746 -2.251094 -0.226312  
C -5.870025 -1.451965 -0.134520  
C -5.731047 -0.101954 0.175475

|   |           |           |           |
|---|-----------|-----------|-----------|
| C | -4.466035 | 0.436637  | 0.381682  |
| H | -2.558102 | -2.291605 | -0.046916 |
| H | -4.836375 | -3.308706 | -0.456813 |
| H | -6.856991 | -1.877817 | -0.293143 |
| H | -6.612083 | 0.529016  | 0.262980  |
| H | -4.367037 | 1.489322  | 0.642801  |
| O | 2.727263  | -2.133367 | -0.066976 |
| C | 3.910054  | -1.708191 | 0.128674  |
| O | 4.274095  | -0.536311 | 0.285987  |
| C | 4.966281  | -2.815227 | 0.162487  |
| H | 4.698924  | -3.552764 | 0.924499  |
| H | 4.975471  | -3.336896 | -0.799330 |
| H | 5.956384  | -2.406056 | 0.369821  |

34

**3** E(gas) = -847.538547944 A.U.

|    |           |           |           |
|----|-----------|-----------|-----------|
| Ag | -1.605887 | 0.345125  | -0.158688 |
| C  | -0.464458 | 2.088300  | -0.359560 |
| N  | 0.856350  | 2.140400  | -0.645479 |
| N  | -0.813037 | 3.373850  | -0.142549 |
| C  | 1.329475  | 3.432071  | -0.593863 |
| C  | 0.271426  | 4.215482  | -0.283395 |
| C  | -2.153089 | 3.816721  | 0.184838  |
| H  | -2.155961 | 4.333701  | 1.146673  |
| H  | -2.531825 | 4.485543  | -0.590974 |
| H  | -2.796369 | 2.939938  | 0.247595  |
| C  | 1.671232  | 0.966288  | -0.906410 |
| C  | 2.356365  | 0.441105  | 0.350176  |
| H  | 1.021927  | 0.195560  | -1.323567 |
| H  | 2.429217  | 1.221312  | -1.651404 |
| C  | 3.025034  | -0.885201 | 0.060696  |
| O  | 3.255367  | 1.445321  | 0.760214  |
| H  | 1.583459  | 0.293007  | 1.121259  |
| H  | 0.198129  | 5.282709  | -0.154268 |
| H  | 2.365392  | 3.670161  | -0.764495 |
| C  | 4.332598  | -0.925078 | -0.418839 |
| C  | 4.926672  | -2.141492 | -0.731996 |
| C  | 4.215866  | -3.325816 | -0.575162 |
| C  | 2.910146  | -3.290633 | -0.099409 |
| C  | 2.317762  | -2.075460 | 0.220951  |
| H  | 4.883023  | 0.003622  | -0.531268 |
| H  | 5.947481  | -2.164710 | -1.099490 |
| H  | 4.679676  | -4.275424 | -0.820554 |
| H  | 2.349813  | -4.210767 | 0.027298  |
| H  | 1.296704  | -2.055485 | 0.594228  |
| C  | 3.704744  | 1.284149  | 2.088148  |
| H  | 4.375256  | 2.117293  | 2.301318  |
| H  | 2.864131  | 1.310180  | 2.794455  |
| H  | 4.249216  | 0.341335  | 2.219337  |
| I  | -2.873422 | -1.914600 | 0.184144  |

40

**4** E(gas) = -1064.37715309 A.U.

|    |          |           |           |
|----|----------|-----------|-----------|
| Ag | 1.941983 | 0.802084  | -0.238459 |
| C  | 1.787790 | -1.249826 | -0.377296 |
| N  | 0.635588 | -1.921949 | -0.600103 |
| N  | 2.697207 | -2.214207 | -0.120079 |
| C  | 0.816644 | -3.279623 | -0.468794 |
| C  | 2.122723 | -3.467854 | -0.173161 |
| C  | 4.093764 | -1.968273 | 0.171788  |
| H  | 4.344077 | -2.338607 | 1.168317  |

|   |           |           |           |
|---|-----------|-----------|-----------|
| H | 4.728417  | -2.458321 | -0.569872 |
| H | 4.262662  | -0.892800 | 0.135648  |
| C | -0.641804 | -1.285617 | -0.883863 |
| C | -1.464442 | -1.020394 | 0.372643  |
| H | -0.444768 | -0.342201 | -1.394138 |
| H | -1.205898 | -1.934837 | -1.558398 |
| C | -2.763121 | -0.337423 | -0.002039 |
| O | -1.656436 | -2.274954 | 0.989927  |
| H | -0.883850 | -0.355815 | 1.030068  |
| H | 2.683781  | -4.371116 | 0.000705  |
| H | 0.005425  | -3.978497 | -0.579748 |
| C | -3.869888 | -1.100499 | -0.372226 |
| C | -5.052134 | -0.480494 | -0.756422 |
| C | -5.133443 | 0.907330  | -0.779018 |
| C | -4.030498 | 1.669432  | -0.411483 |
| C | -2.846087 | 1.054560  | -0.019910 |
| H | -3.801724 | -2.183601 | -0.339463 |
| H | -5.911664 | -1.081202 | -1.036582 |
| H | -6.056709 | 1.393131  | -1.078107 |
| H | -4.090866 | 2.752962  | -0.421909 |
| H | -1.985360 | 1.654239  | 0.271323  |
| C | -2.104703 | -2.173629 | 2.323160  |
| H | -2.191875 | -3.190152 | 2.709119  |
| H | -1.387192 | -1.615251 | 2.939156  |
| H | -3.082117 | -1.679824 | 2.384774  |
| O | 2.047328  | 2.907128  | -0.058901 |
| C | 0.907989  | 3.261315  | 0.407606  |
| O | -0.008830 | 2.473082  | 0.677670  |
| C | 0.724927  | 4.750277  | 0.604116  |
| H | 1.591051  | 5.168304  | 1.121028  |
| H | 0.668585  | 5.233789  | -0.375354 |
| H | -0.187558 | 4.957214  | 1.162109  |

37

5 E(gas) = -1025.11806299 A.U.

|    |           |           |           |
|----|-----------|-----------|-----------|
| Ag | 1.797035  | 0.825927  | -0.216337 |
| C  | 1.770202  | -1.236218 | -0.244705 |
| N  | 0.660848  | -1.993943 | -0.399931 |
| N  | 2.751464  | -2.124472 | 0.022037  |
| C  | 0.939334  | -3.329429 | -0.218651 |
| C  | 2.263605  | -3.415128 | 0.041182  |
| C  | 4.135828  | -1.771337 | 0.256100  |
| H  | 4.439143  | -2.069388 | 1.262156  |
| H  | 4.780723  | -2.257807 | -0.479006 |
| H  | 4.230090  | -0.690563 | 0.158280  |
| C  | -0.664381 | -1.457235 | -0.670505 |
| C  | -1.475715 | -1.215921 | 0.596970  |
| H  | -0.543793 | -0.516946 | -1.209440 |
| H  | -1.196490 | -2.163578 | -1.313156 |
| C  | -2.827460 | -0.637231 | 0.241534  |
| O  | -1.564485 | -2.471279 | 1.247692  |
| H  | -0.926318 | -0.492344 | 1.214881  |
| H  | 2.890618  | -4.269645 | 0.234890  |
| H  | 0.174638  | -4.085340 | -0.269730 |
| C  | -3.909331 | -1.481237 | -0.005418 |
| C  | -5.144018 | -0.952427 | -0.361988 |
| C  | -5.303079 | 0.423316  | -0.478904 |
| C  | -4.224563 | 1.266290  | -0.233978 |
| C  | -2.988056 | 0.744292  | 0.127550  |
| H  | -3.778779 | -2.553951 | 0.095535  |



|   |           |           |           |
|---|-----------|-----------|-----------|
| H | -5.982633 | -1.615881 | -0.547969 |
| H | -6.267076 | 0.837829  | -0.755858 |
| H | -4.345018 | 2.341536  | -0.317739 |
| H | -2.148704 | 1.409472  | 0.323030  |
| H | -2.048835 | -2.341059 | 2.066229  |
| O | 1.802936  | 2.941486  | -0.151868 |
| C | 0.633362  | 3.266108  | 0.257500  |
| O | -0.256408 | 2.451098  | 0.537780  |
| C | 0.380814  | 4.753050  | 0.376863  |
| H | 1.173176  | 5.216115  | 0.969098  |
| H | 0.417597  | 5.204362  | -0.618414 |
| H | -0.590780 | 4.945752  | 0.830181  |

37

**6** E(gas) = -1944.02382435 A.U.

|    |           |           |           |
|----|-----------|-----------|-----------|
| Ag | 0.014401  | -2.155348 | -0.212431 |
| C  | -1.460948 | -0.713331 | -0.239489 |
| N  | -1.250458 | 0.610151  | -0.425962 |
| N  | -2.780548 | -0.831086 | 0.025863  |
| C  | -2.423328 | 1.316066  | -0.266735 |
| C  | -3.389712 | 0.405295  | 0.011569  |
| C  | -3.462433 | -2.082713 | 0.285889  |
| H  | -3.899664 | -2.074773 | 1.286002  |
| H  | -4.248341 | -2.246365 | -0.453763 |
| H  | -2.720785 | -2.877128 | 0.216188  |
| C  | 0.062714  | 1.196180  | -0.674982 |
| C  | 0.878711  | 1.369336  | 0.603564  |
| H  | 0.595928  | 0.542430  | -1.366075 |
| H  | -0.088151 | 2.165150  | -1.153752 |
| C  | 2.174772  | 2.081024  | 0.285335  |
| O  | 0.052411  | 2.093861  | 1.495341  |
| H  | 1.109647  | 0.370462  | 0.998623  |
| Cl | -5.047023 | 0.637994  | 0.288110  |
| Cl | -2.575456 | 2.991986  | -0.447662 |
| C  | 2.205130  | 3.473645  | 0.208263  |
| C  | 3.385975  | 4.131703  | -0.110507 |
| C  | 4.543329  | 3.401681  | -0.358214 |
| C  | 4.515499  | 2.014192  | -0.278891 |
| C  | 3.337565  | 1.349398  | 0.044255  |
| H  | 1.300174  | 4.035994  | 0.416343  |
| H  | 3.403778  | 5.215583  | -0.163685 |
| H  | 5.466980  | 3.914930  | -0.605721 |
| H  | 5.419440  | 1.441913  | -0.460967 |
| H  | 3.316993  | 0.264338  | 0.122835  |
| H  | 0.542445  | 2.212230  | 2.312199  |
| O  | 1.528650  | -3.625469 | -0.162633 |
| C  | 2.589205  | -2.992218 | 0.176107  |
| O  | 2.622847  | -1.776155 | 0.414242  |
| C  | 3.848495  | -3.825417 | 0.250923  |
| H  | 3.642619  | -4.777575 | 0.742911  |
| H  | 4.183022  | -4.049893 | -0.766192 |
| H  | 4.637147  | -3.286006 | 0.774290  |
